# Supplementary material for: Exploiting propane-1,3-diimines as building blocks for superbases: a DFT study
Source: Royal Society of Chemistry journal article supplement (doi:10.1039/c1nj20426b), 2011-01-01
Supplement: c1nj20426b.pdf [file c1nj20426b.pdf]

## Electronic Supplementary Information

# Exploiting Propane-1,3-diimines as Building Blocks for Superbases: A DFT Study

*Rabindranath Lo and Bishwajit Ganguly\**

Analytical Science Discipline, Central Salt & Marine Chemicals Research Institute (Council of Scientific and Industrial Research), Bhavnagar, Gujarat, India-364 002.

E-mail: [ganguly@csmcri.org](mailto:ganguly@csmcri.org)

### Table of content

| S. No. | Entry name                                                                                                                                                                                                                                           | Page No. |
|--------|------------------------------------------------------------------------------------------------------------------------------------------------------------------------------------------------------------------------------------------------------|----------|
| 1      | B3LYP/6-311+G**//B3LYP/6-31+G* SCF energies in gas phase (E) and solution phase ( $E_{\text{PCM}}$ ), B3LYP/6-31+G* zero point vibrational energies (ZPVE), and Cartesian coordinates for <b>2-7</b> and their corresponding monoprotonated cations. | S2       |
| 2      | Cartesian coordinates of B3LYP/6-31+G* optimized transition state geometries of <b>3</b> with HCl including electronic energy (E), zero point energy (ZPVE).                                                                                         | S13      |
| 3      | <b>Scheme S1</b>                                                                                                                                                                                                                                     | S14      |
| 4      | <b>Table S1</b> Comparison of experimental and calculated (B3LYP/6-311+G**//B3LYP/6-31+G*) gas phase basicities (GB) of some organic superbases.                                                                                                     | S14      |
| 5      | <b>Fig. S1</b> B3LYP/6-31+G* optimized geometries of <b>1</b> and <b>1a</b> (relative energies are in kcal/mol).                                                                                                                                     | S14      |
| 6      | <b>Fig. S2</b> Isodesmic reactions used to obtain strain energy of unprotonated bases and the sum of the cation strain and the H-bond energies ( $\text{SE}+\text{HB}$ ) <sup>+</sup> for their corresponding monoprotonated cations.                | S15      |
| 7      | <b>Fig. S3</b> The model systems used to estimate cationic hydrogen bond energies for (a) <b>4H</b> <sup>+</sup> and (b) <b>6H</b> <sup>+</sup> .                                                                                                    | S15      |
| 8      | <b>Scheme S2</b>                                                                                                                                                                                                                                     | S15      |
| 9      | <b>Table S2</b> Comparison of experimental and calculated (B3LYP/6-311+G**//B3LYP/6-31+G*) pKa(MeCN) of imine bases.                                                                                                                                 | S16      |
| 10     | <b>Fig. S4</b> B3LYP/6-31+G* optimized geometries of <b>6a</b> and its conjugate acids.                                                                                                                                                              | S16      |

**B3LYP/6-311+G\*\*//B3LYP/6-31+G\* SCF energies in gas phase (E) and solution phase ( $E_{\text{PCM}}$ ),  
B3LYP/6-31+G\* zero point vibrational energies (ZPVE), and Cartesian coordinates for 2-7 and  
their corresponding monoprotonated cations (All energies are given in Hartree).**

**2**

E = -384.75171

ZPVE = 0.202860

$E_{\text{PCM}}$  = -384.75570

|   |             |             |             |
|---|-------------|-------------|-------------|
| C | -1.41649900 | 0.27562700  | 0.05650100  |
| C | 0.98215900  | -0.26880900 | -0.33887700 |
| C | -0.00646600 | 0.83713700  | -0.01985100 |
| N | 2.04256800  | -0.46303700 | 0.33019100  |
| C | 0.03180800  | 1.86727600  | -1.18104200 |
| C | 0.31509700  | 1.54099100  | 1.31294600  |
| N | -1.69531100 | -0.95852400 | -0.04056300 |
| H | 1.01422400  | 2.35058000  | -1.22511100 |
| H | -0.16068500 | 1.38825000  | -2.14856600 |
| H | -0.72534100 | 2.64732100  | -1.03259700 |
| H | 1.30900100  | 1.99627600  | 1.27236400  |
| H | -0.42269900 | 2.32715900  | 1.51636100  |
| H | 0.31027200  | 0.82943200  | 2.14406800  |
| H | -2.20611400 | 1.03528800  | 0.21247300  |
| H | 0.73030800  | -0.88220200 | -1.21859300 |
| C | -3.08727300 | -1.36207300 | 0.06127800  |
| H | -3.37437400 | -1.89566800 | -0.85266000 |
| H | -3.19435000 | -2.06881300 | 0.89274000  |
| H | -3.78142800 | -0.51835600 | 0.21661700  |
| C | 2.93333000  | -1.52933800 | -0.09691700 |
| H | 3.92686800  | -1.10947500 | -0.29577000 |
| H | 3.04733900  | -2.24899900 | 0.72269900  |
| H | 2.58324100  | -2.06474000 | -0.99565600 |

**2H<sup>+</sup>**

E = -385.14376

ZPVE = 0.217371

$E_{\text{PCM}}$  = -385.20817

|   |             |             |             |
|---|-------------|-------------|-------------|
| C | -1.24431300 | 0.36361600  | -0.00008000 |
| C | 1.30136100  | 0.17258400  | 0.00015100  |
| C | 0.07695600  | 1.07574100  | 0.00001600  |
| N | 1.25140100  | -1.09760300 | -0.00005000 |
| C | 0.11591700  | 1.97582700  | -1.27141400 |
| C | 0.11563000  | 1.97592600  | 1.27135400  |
| N | -1.39313900 | -0.91171600 | -0.00008700 |
| H | 1.04543300  | 2.55429100  | -1.27586900 |
| H | 0.07661300  | 1.38104200  | -2.18939300 |
| H | -0.71751500 | 2.68642400  | -1.27377000 |
| H | 1.04491700  | 2.55476400  | 1.27575100  |

|   |             |             |             |
|---|-------------|-------------|-------------|
| H | -0.71805200 | 2.68623900  | 1.27373600  |
| H | 0.07654500  | 1.38121400  | 2.18939400  |
| H | -2.14567700 | 0.98024700  | -0.00024200 |
| H | 2.25915400  | 0.71344600  | 0.00036500  |
| C | -2.66784800 | -1.63538600 | 0.00002500  |
| H | -2.71368900 | -2.26901000 | -0.88980300 |
| H | -2.71483300 | -2.26670700 | 0.89144600  |
| H | -3.49947100 | -0.92802600 | -0.00141900 |
| C | 2.48579200  | -1.87575400 | 0.00004300  |
| H | 2.49464600  | -2.52230000 | 0.88337100  |
| H | 2.49466400  | -2.52247900 | -0.88314900 |
| H | 3.38397100  | -1.24457100 | 0.00000100  |
| H | -0.47550000 | -1.43466400 | -0.00003600 |

### 3

E = -344.19480

ZPVE = 0.151585

E<sub>PCM</sub> = -344.20079

|   |             |             |             |
|---|-------------|-------------|-------------|
| C | -1.13568333 | -0.00571667 | 0.02180000  |
| C | -2.48468333 | -0.01171667 | 0.04880000  |
| C | -0.43068333 | -1.30471667 | -0.06120000 |
| C | -0.44068333 | 1.30028333  | 0.07780000  |
| N | 0.78731667  | -1.48671667 | 0.25380000  |
| N | 0.76231667  | 1.49428333  | -0.28320000 |
| C | 1.28131667  | 2.84528333  | -0.20820000 |
| C | 1.31531667  | -2.83271667 | 0.15780000  |
| H | -3.05268333 | -0.93671667 | -0.02020000 |
| H | -3.05868333 | 0.90728333  | 0.14080000  |
| H | -1.07068333 | -2.14571667 | -0.38520000 |
| H | -1.07668333 | 2.13528333  | 0.42380000  |
| H | 2.16231667  | 2.85128333  | 0.44480000  |
| H | 1.62131667  | 3.15328333  | -1.20520000 |
| H | 0.55131667  | 3.58528333  | 0.16580000  |
| H | 2.17131667  | -2.82971667 | -0.52920000 |
| H | 1.69631667  | -3.13771667 | 1.13980000  |
| H | 0.57931667  | -3.57971667 | -0.19020000 |

### 3H<sup>+</sup>

E = -344.59485

ZPVE = 0.166709

E<sub>PCM</sub> = -344.65975

|   |             |             |             |
|---|-------------|-------------|-------------|
| C | -1.21839344 | 0.36095082  | 0.08485246  |
| C | -2.52739344 | 0.69895082  | 0.17085246  |
| C | -0.89339344 | -1.05404918 | -0.02614754 |
| C | -0.15839344 | 1.39395082  | 0.10085246  |
| N | 1.07660656  | 1.08695082  | 0.01885246  |
| C | 2.08360656  | 2.13895082  | 0.03885246  |
| C | 0.71560656  | -2.90104918 | -0.22914754 |
| N | 0.31760656  | -1.49704918 | -0.11314754 |
| H | -3.31839344 | -0.04604918 | 0.15985246  |
| H | -2.83839344 | 1.73595082  | 0.25585246  |
| H | -1.70539344 | -1.78104918 | -0.03714754 |

|   |             |             |             |
|---|-------------|-------------|-------------|
| H | -0.50239344 | 2.43295082  | 0.18685246  |
| H | 2.76260656  | 1.95895082  | 0.87885246  |
| H | 2.67460656  | 2.07595082  | -0.88014754 |
| H | 1.64960656  | 3.14395082  | 0.12685246  |
| H | 1.28060656  | -3.03504918 | -1.15514754 |
| H | 1.35460656  | -3.16004918 | 0.61985246  |
| H | -0.16939344 | -3.54104918 | -0.23714754 |
| H | 1.04260656  | -0.74004918 | -0.09914754 |

#### 4

E = -1374.85301

ZPVE = 0.371169

E<sub>PCM</sub> = -1374.86975

|   |             |             |             |
|---|-------------|-------------|-------------|
| C | -0.47702564 | -1.23349359 | -0.52842949 |
| C | 0.15097436  | -0.29149359 | 0.30757051  |
| C | 0.20497436  | -2.49149359 | -0.80942949 |
| C | -1.85802564 | -1.00449359 | -0.94042949 |
| N | -2.38602564 | -1.36149359 | -2.05442949 |
| N | -0.30902564 | -3.51449359 | -1.39042949 |
| N | 1.22197436  | -0.68649359 | 1.07057051  |
| N | -0.25802564 | 1.03350641  | 0.42957051  |
| P | 1.97497436  | 0.22150641  | 2.14557051  |
| P | -0.78902564 | 2.00250641  | -0.73342949 |
| C | 0.55397436  | -4.66149359 | -1.58342949 |
| C | -3.81902564 | -1.21149359 | -2.19242949 |
| C | -2.59502564 | 2.35250641  | -0.77942949 |
| C | -0.08202564 | 3.66650641  | -0.42542949 |
| C | -0.31702564 | 1.58950641  | -2.45742949 |
| C | 0.95797436  | 0.81050641  | 3.55757051  |
| C | 2.88497436  | 1.72250641  | 1.57757051  |
| C | 3.26497436  | -0.83849359 | 2.87957051  |
| H | 1.24997436  | -2.51849359 | -0.46142949 |
| H | -2.49302564 | -0.51749359 | -0.17142949 |
| H | 0.10797436  | -5.54649359 | -1.10642949 |
| H | 0.63597436  | -4.89049359 | -2.65542949 |
| H | 1.57597436  | -4.52649359 | -1.17942949 |
| H | -4.05102564 | -0.65049359 | -3.10942949 |
| H | -4.28002564 | -2.20249359 | -2.30542949 |
| H | -4.30402564 | -0.71049359 | -1.33142949 |
| H | -2.80102564 | 3.20050641  | -1.44342949 |
| H | -3.14902564 | 1.48150641  | -1.13142949 |
| H | -2.93302564 | 2.59950641  | 0.23157051  |
| H | -0.49102564 | 4.40550641  | -1.12242949 |
| H | -0.31702564 | 3.97450641  | 0.59857051  |
| H | 1.00497436  | 3.63250641  | -0.54142949 |
| H | -0.59602564 | 2.41450641  | -3.12342949 |
| H | 0.76597436  | 1.43750641  | -2.50642949 |
| H | -0.81502564 | 0.67050641  | -2.77842949 |
| H | 1.56497436  | 1.35850641  | 4.28757051  |
| H | 0.16697436  | 1.45750641  | 3.16857051  |
| H | 0.49497436  | -0.05249359 | 4.04557051  |
| H | 3.49397436  | 2.13950641  | 2.38757051  |

|   |            |             |            |
|---|------------|-------------|------------|
| H | 3.53797436 | 1.45050641  | 0.74257051 |
| H | 2.16897436 | 2.47450641  | 1.23857051 |
| H | 3.81797436 | -0.30549359 | 3.66057051 |
| H | 2.79497436 | -1.72949359 | 3.30557051 |
| H | 3.95897436 | -1.15849359 | 2.09657051 |

#### 4H<sup>+</sup>

E = -1375.32933

ZPVE = 0.386932

E<sub>PCM</sub> = -1375.37704

|   |             |             |             |
|---|-------------|-------------|-------------|
| C | -0.04044586 | -1.28763057 | -0.46386624 |
| C | 0.18255414  | -0.09763057 | 0.36513376  |
| C | 1.01355414  | -2.19663057 | -0.59486624 |
| C | -1.35444586 | -1.58463057 | -0.99886624 |
| N | -1.61544586 | -2.59063057 | -1.76186624 |
| N | 1.07355414  | -0.23963057 | 1.35713376  |
| N | -0.46444586 | 1.07836943  | 0.18813376  |
| P | 1.46955414  | 0.92236943  | 2.43013376  |
| P | -1.16944586 | 1.78636943  | -1.08386624 |
| C | 2.07355414  | -4.25663057 | -1.44386624 |
| C | -2.99644586 | -2.84163057 | -2.13586624 |
| C | -2.99444586 | 1.83436943  | -0.97286624 |
| C | -0.66644586 | 3.53936943  | -1.06086624 |
| C | -0.73844586 | 1.19136943  | -2.76186624 |
| C | 0.09155414  | 1.43436943  | 3.51213376  |
| C | 2.22055414  | 2.45136943  | 1.75613376  |
| C | 2.72955414  | 0.17436943  | 3.50413376  |
| N | 0.96855414  | -3.31863057 | -1.30186624 |
| H | 1.95055414  | -1.97563057 | -0.09186624 |
| H | -2.17244586 | -0.93063057 | -0.65986624 |
| H | 1.78555414  | -5.24363057 | -1.06786624 |
| H | 2.36155414  | -4.35163057 | -2.49686624 |
| H | 2.93455414  | -3.89963057 | -0.87186624 |
| H | -3.08344586 | -2.87163057 | -3.22886624 |
| H | -3.30544586 | -3.82463057 | -1.76186624 |
| H | -3.69644586 | -2.08563057 | -1.74186624 |
| H | -3.40044586 | 2.49836943  | -1.74386624 |
| H | -3.42444586 | 0.83836943  | -1.10086624 |
| H | -3.28144586 | 2.21536943  | 0.01213376  |
| H | -1.17244586 | 4.09936943  | -1.85386624 |
| H | -0.92344586 | 3.98136943  | -0.09386624 |
| H | 0.41555414  | 3.61536943  | -1.20786624 |
| H | -1.16044586 | 1.87636943  | -3.50586624 |
| H | 0.35055414  | 1.17536943  | -2.87286624 |
| H | -1.12144586 | 0.18536943  | -2.94286624 |
| H | 0.43955414  | 2.14336943  | 4.27013376  |
| H | -0.69244586 | 1.89736943  | 2.90713376  |
| H | -0.32044586 | 0.55136943  | 4.00913376  |
| H | 2.58255414  | 3.08636943  | 2.57213376  |
| H | 3.06555414  | 2.18736943  | 1.11213376  |
| H | 1.48155414  | 3.00136943  | 1.17013376  |
| H | 3.03755414  | 0.87236943  | 4.28813376  |

|   |            |             |             |
|---|------------|-------------|-------------|
| H | 2.32055414 | -0.73063057 | 3.96313376  |
| H | 3.60155414 | -0.10463057 | 2.90513376  |
| H | 0.06655414 | -3.50663057 | -1.75886624 |

## 5

E = -1601.58014

ZPVE = 0.396261

E<sub>PCM</sub> = -1601.60213

|   |             |             |             |
|---|-------------|-------------|-------------|
| C | -1.05308152 | 0.08780435  | -1.89961413 |
| O | -0.18808152 | 1.05480435  | -2.43661413 |
| C | -0.83308152 | 1.55880435  | -3.62561413 |
| C | -2.00308152 | 0.57580435  | -3.84961413 |
| C | -1.17008152 | -1.94819565 | -0.53161413 |
| O | -1.91408152 | -2.15719565 | 0.62038587  |
| C | -1.87408152 | -4.02819565 | -0.78961413 |
| C | -2.21008152 | -3.56719565 | 0.64638587  |
| N | -2.12308152 | -0.14119565 | -2.58361413 |
| N | -1.06308152 | -2.93419565 | -1.33861413 |
| C | -0.63108152 | -0.58619565 | -0.70161413 |
| C | 0.33891848  | -0.15219565 | 0.22338587  |
| N | 0.77291848  | 1.13580435  | 0.45138587  |
| N | 0.91191848  | -1.13719565 | 0.98438587  |
| P | 2.04891848  | -0.90519565 | 2.08238587  |
| P | 0.10691848  | 2.56680435  | 0.22438587  |
| C | 2.44591848  | -2.55819565 | 2.74038587  |
| C | 1.64291848  | 0.10080435  | 3.57138587  |
| C | 3.64691848  | -0.22819565 | 1.47638587  |
| C | 0.37091848  | 3.54680435  | 1.75538587  |
| C | 0.93591848  | 3.59680435  | -1.04661413 |
| C | -1.70508152 | 2.68680435  | -0.04361413 |
| H | -1.17508152 | 2.58680435  | -3.43361413 |
| H | -0.09308152 | 1.57480435  | -4.43061413 |
| H | -2.93808152 | 1.08980435  | -4.10361413 |
| H | -1.78808152 | -0.13319565 | -4.66361413 |
| H | -2.77408152 | -4.15819565 | -1.40761413 |
| H | -1.31708152 | -4.97119565 | -0.81061413 |
| H | -3.25808152 | -3.69319565 | 0.93238587  |
| H | -1.56808152 | -4.04019565 | 1.40238587  |
| H | 2.75291848  | -3.20519565 | 1.91338587  |
| H | 3.24791848  | -2.50819565 | 3.48438587  |
| H | 1.54891848  | -2.98719565 | 3.19638587  |
| H | 1.48891848  | 1.14080435  | 3.27738587  |
| H | 0.71691848  | -0.28119565 | 4.01438587  |
| H | 2.44691848  | 0.04580435  | 4.31438587  |
| H | 4.39291848  | -0.18819565 | 2.27838587  |
| H | 4.01591848  | -0.86819565 | 0.66838587  |
| H | 3.47491848  | 0.77380435  | 1.07538587  |
| H | -0.19108152 | 3.10180435  | 2.58138587  |
| H | 1.43591848  | 3.53980435  | 2.01038587  |
| H | 0.04591848  | 4.58480435  | 1.62038587  |
| H | 0.90791848  | 3.07880435  | -2.00561413 |
| H | 0.45391848  | 4.57680435  | -1.13061413 |

|   |             |            |             |
|---|-------------|------------|-------------|
| H | 1.98091848  | 3.73880435 | -0.75161413 |
| H | -2.02008152 | 3.73280435 | 0.04938587  |
| H | -1.99808152 | 2.30080435 | -1.02061413 |
| H | -2.21208152 | 2.08880435 | 0.72038587  |

**5H<sup>+</sup>**

E = -1602.04857

ZPVE = 0.411374

E<sub>PCM</sub> = -1602.09836

|   |             |             |             |
|---|-------------|-------------|-------------|
| C | -0.35036757 | -0.17325946 | -2.06690270 |
| O | 0.78163243  | 0.44174054  | -2.49290270 |
| C | 0.69363243  | 0.61574054  | -3.93590270 |
| C | -0.40336757 | -0.36725946 | -4.36690270 |
| C | -1.71236757 | -1.24125946 | -0.35990270 |
| O | -1.86336757 | -1.47625946 | 0.98409730  |
| C | -3.58636757 | -2.43925946 | -0.30890270 |
| C | -2.95536757 | -2.43125946 | 1.10209730  |
| N | -2.60336757 | -1.74025946 | -1.14990270 |
| C | -0.57936757 | -0.42425946 | -0.73390270 |
| C | 0.47063243  | -0.09125946 | 0.29209730  |
| N | 0.50163243  | 1.07874054  | 0.95109730  |
| N | 1.36063243  | -1.04825946 | 0.50709730  |
| P | 2.56363243  | -0.93025946 | 1.62209730  |
| P | -0.55436757 | 2.31874054  | 0.77909730  |
| C | 3.46463243  | -2.50225946 | 1.51009730  |
| C | 1.98763243  | -0.76525946 | 3.34609730  |
| C | 3.77563243  | 0.39974054  | 1.31009730  |
| C | -0.12036757 | 3.48874054  | 2.10109730  |
| C | -0.39936757 | 3.24574054  | -0.78790270 |
| C | -2.32936757 | 1.94074054  | 0.99409730  |
| N | -1.15636757 | -0.46725946 | -3.11790270 |
| H | 0.42063243  | 1.65674054  | -4.13690270 |
| H | 1.67863243  | 0.40274054  | -4.35390270 |
| H | -1.02236757 | 0.02674054  | -5.17690270 |
| H | 0.00863243  | -1.33925946 | -4.67090270 |
| H | -4.54736757 | -1.90925946 | -0.34090270 |
| H | -3.75836757 | -3.45425946 | -0.68090270 |
| H | -3.61936757 | -2.08525946 | 1.89609730  |
| H | -2.52236757 | -3.39725946 | 1.38309730  |
| H | 3.84863243  | -2.62625946 | 0.49309730  |
| H | 4.29663243  | -2.52725946 | 2.22009730  |
| H | 2.77863243  | -3.32725946 | 1.72209730  |
| H | 1.47663243  | 0.19174054  | 3.47009730  |
| H | 1.28763243  | -1.57525946 | 3.57009730  |
| H | 2.83563243  | -0.82225946 | 4.03709730  |
| H | 4.60563243  | 0.33274054  | 2.02109730  |
| H | 4.16763243  | 0.29774054  | 0.29309730  |
| H | 3.28463243  | 1.36974054  | 1.40709730  |
| H | -0.25336757 | 3.00774054  | 3.07509730  |
| H | 0.92663243  | 3.78774054  | 1.99809730  |
| H | -0.75536757 | 4.37974054  | 2.05209730  |
| H | -0.73136757 | 2.62474054  | -1.62390270 |



|   |             |             |             |
|---|-------------|-------------|-------------|
| H | -1.01036757 | 4.15374054  | -0.74890270 |
| H | 0.64763243  | 3.52074054  | -0.94590270 |
| H | -2.89236757 | 2.87674054  | 1.08309730  |
| H | -2.70636757 | 1.37274054  | 0.14109730  |
| H | -2.46636757 | 1.34674054  | 1.90209730  |
| H | -1.91636757 | -1.12925946 | -2.93790270 |

## 6

E = -1680.22006

ZPVE = 0.454050

E<sub>PCM</sub> = -1680.23702

|   |             |             |             |
|---|-------------|-------------|-------------|
| C | 4.32228500  | 0.39027700  | -0.20335200 |
| C | 4.45094500  | -1.02756000 | -0.77615600 |
| C | 3.28071000  | -1.24422900 | -1.72512100 |
| C | 1.94761400  | 0.12916900  | -0.28687800 |
| C | 0.75498500  | 4.33523200  | -0.50620700 |
| C | 0.45299300  | 2.06263200  | 0.10578900  |
| C | -0.45672100 | 3.72580500  | 1.55529400  |
| C | 0.58603300  | 4.67532500  | 0.97987600  |
| N | 0.79206000  | 2.90480800  | -0.78976400 |
| C | -0.59902300 | -0.14684600 | -0.17092600 |
| C | 0.58717100  | 0.59296700  | -0.07911800 |
| N | 2.96873600  | 0.77256600  | 0.15924900  |
| N | -1.74726000 | 0.58208000  | -0.38833300 |
| N | -0.75500700 | -1.51778600 | -0.06281600 |
| P | 0.06010600  | -2.61835100 | 0.74793000  |
| P | -3.19728800 | -0.04114900 | -0.60717400 |
| C | -4.30519000 | 1.37300400  | -0.92252700 |
| C | -4.00317600 | -0.94843600 | 0.78263100  |
| C | -3.40563000 | -1.14878000 | -2.06047000 |
| C | -1.14109500 | -3.64550300 | 1.68767900  |
| C | 0.90291300  | -3.87187000 | -0.29367700 |
| C | 1.25845400  | -2.08094700 | 2.02936300  |
| O | 2.03335000  | -1.04589000 | -1.04714200 |
| O | -0.05396100 | 2.36674700  | 1.35679400  |
| H | 4.70126800  | 1.11887800  | -0.93821500 |
| H | 4.95779000  | 0.50285500  | 0.68499300  |
| H | 4.40971300  | -1.77593400 | 0.02768800  |
| H | 5.40462200  | -1.16184800 | -1.30416900 |
| H | 3.33226600  | -0.54513500 | -2.57208000 |
| H | 3.24338000  | -2.26291000 | -2.12675800 |
| H | -0.06618900 | 4.77829400  | -1.09005900 |
| H | 1.68024400  | 4.77790800  | -0.89814900 |
| H | -1.43191200 | 3.87642400  | 1.06639200  |
| H | -0.58594200 | 3.84118900  | 2.63587400  |
| H | 1.53346400  | 4.52851000  | 1.51386600  |
| H | 0.27824300  | 5.72032700  | 1.11956200  |
| H | -5.32881900 | 1.03944500  | -1.12411500 |
| H | -4.30376400 | 2.03387800  | -0.05039600 |
| H | -3.92776800 | 1.93677000  | -1.77966800 |
| H | -3.95794600 | -0.32901300 | 1.68456400  |
| H | -5.05144100 | -1.17211600 | 0.55130200  |



|   |             |             |             |
|---|-------------|-------------|-------------|
| H | -3.46473300 | -1.88018200 | 0.96846800  |
| H | -3.07631300 | -0.61544600 | -2.95852300 |
| H | -2.76855200 | -2.02552800 | -1.92482600 |
| H | -4.44926100 | -1.45782400 | -2.18295700 |
| H | -1.90552200 | -4.02647900 | 1.00325200  |
| H | -0.64414300 | -4.49338100 | 2.17178300  |
| H | -1.62975700 | -3.03302600 | 2.45315600  |
| H | 0.16210900  | -4.33066500 | -0.95630700 |
| H | 1.66392100  | -3.38264300 | -0.90006200 |
| H | 1.36036100  | -4.65268700 | 0.32565700  |
| H | 0.78188200  | -1.32656800 | 2.66304700  |
| H | 1.55134800  | -2.93960500 | 2.64304400  |
| H | 2.14475300  | -1.63094500 | 1.57954700  |

### 6H<sup>+</sup>

E = -1680.69884

ZPVE = 0.469734

E<sub>PCM</sub> = -1680.74650

|   |             |             |             |
|---|-------------|-------------|-------------|
| C | 3.57384100  | -2.39253100 | -1.10751600 |
| C | 2.85573200  | -3.61952700 | -0.54905300 |
| C | 1.37917200  | -3.51085000 | -0.89753100 |
| C | 1.49558300  | -1.14150500 | -0.50468300 |
| C | 3.20590200  | 2.84397700  | -0.94026500 |
| C | 1.39560200  | 1.33961300  | -0.48919100 |
| C | 0.89550500  | 3.67721300  | -0.67395300 |
| C | 2.34546400  | 3.93228900  | -0.29280300 |
| N | 2.63743600  | 1.50439200  | -0.80444500 |
| C | -0.71227100 | -0.04570600 | -0.14950300 |
| C | 0.78479100  | 0.03388600  | -0.29775100 |
| N | -1.39012500 | -0.05816200 | -1.29089900 |
| N | -1.33368800 | -0.08673000 | 1.04095900  |
| P | -0.61309800 | -0.12972800 | 2.50866000  |
| P | -3.03190000 | -0.08550000 | -1.35834800 |
| C | -3.43153900 | -0.08232700 | -3.12994700 |
| C | -3.85199300 | 1.37230000  | -0.62726600 |
| C | -3.81948200 | -1.57308400 | -0.64726700 |
| C | 0.68781500  | 1.10115000  | 2.87423200  |
| C | -1.94979100 | 0.19108000  | 3.70043200  |
| C | 0.07318400  | -1.76479900 | 2.94489800  |
| O | 0.81144300  | -2.30427000 | -0.33644300 |
| O | 0.49106100  | 2.35277000  | -0.26679200 |
| N | 2.80691500  | -1.18652900 | -0.80616400 |
| H | 3.69613400  | -2.49169100 | -2.19552600 |
| H | 4.57283700  | -2.28590200 | -0.67231100 |
| H | 2.97269800  | -3.67447700 | 0.54034500  |
| H | 3.27780800  | -4.53541700 | -0.97748100 |
| H | 1.22329800  | -3.49315000 | -1.98366500 |
| H | 0.78401400  | -4.31993000 | -0.46808000 |
| H | 3.33815200  | 3.05783200  | -2.01139200 |
| H | 4.21111000  | 2.83181000  | -0.50363900 |
| H | 0.75055000  | 3.76127900  | -1.75856800 |
| H | 0.19805900  | 4.35432400  | -0.17458800 |

|   |             |             |             |
|---|-------------|-------------|-------------|
| H | 2.44620000  | 3.90258200  | 0.80051700  |
| H | 2.65451900  | 4.93038900  | -0.62507200 |
| H | -4.51457600 | -0.09632200 | -3.28674500 |
| H | -3.00703900 | 0.81282700  | -3.59423700 |
| H | -2.98401900 | -0.96069600 | -3.60382500 |
| H | -3.43678200 | 2.28007700  | -1.07661100 |
| H | -4.93000300 | 1.33909800  | -0.81710800 |
| H | -3.66716200 | 1.39163100  | 0.44846700  |
| H | -3.37835400 | -2.46616400 | -1.09931100 |
| H | -3.64492200 | -1.59713100 | 0.43108500  |
| H | -4.89639400 | -1.56619100 | -0.84687000 |
| H | 0.33918100  | 2.09458300  | 2.57901100  |
| H | 0.89872000  | 1.09347900  | 3.95016800  |
| H | 1.60159300  | 0.87063200  | 2.32229100  |
| H | -2.35664700 | 1.19299500  | 3.53348200  |
| H | -2.75126100 | -0.53979400 | 3.55945600  |
| H | -1.57628300 | 0.12255100  | 4.72723100  |
| H | 0.87115200  | -2.02788700 | 2.24618800  |
| H | 0.46578100  | -1.75248800 | 3.96740700  |
| H | -0.71593700 | -2.52009400 | 2.87096100  |
| H | 3.20364800  | -0.24621600 | -0.96354600 |

7

E = -1835.11524

ZPVE = 0.525566

E<sub>PCM</sub> = -1835.12510

|   |             |             |             |
|---|-------------|-------------|-------------|
| C | 1.17841800  | 2.54407900  | -2.16331600 |
| H | 2.22369700  | 2.85601700  | -2.28801900 |
| O | 0.00000000  | 2.39581200  | -0.11494800 |
| N | 1.14277300  | 1.17177100  | -1.65566300 |
| C | -0.82525500 | 3.97362000  | -1.81276500 |
| C | -1.04701700 | 3.05196100  | -3.02825300 |
| H | -0.58006500 | 4.99043600  | -2.15224900 |
| H | -1.68756400 | 4.04697700  | -1.14144700 |
| C | 0.38604500  | 2.71928900  | -3.48198000 |
| H | -1.56428400 | 2.13419800  | -2.72340100 |
| H | -1.64558100 | 3.52577900  | -3.81497200 |
| H | 0.45237900  | 1.81953500  | -4.10121600 |
| H | 0.80348700  | 3.55939200  | -4.05619200 |
| C | 0.39901500  | 3.38213200  | -1.09321400 |
| H | 0.99215200  | 4.14263100  | -0.57281600 |
| C | 0.43377400  | 1.15533100  | -0.57814300 |
| C | -1.17841800 | -2.54407900 | -2.16331600 |
| H | -2.22369700 | -2.85601700 | -2.28801900 |
| O | 0.00000000  | -2.39581200 | -0.11494800 |
| N | -1.14277300 | -1.17177100 | -1.65566300 |
| C | 0.82525500  | -3.97362000 | -1.81276500 |
| C | 1.04701700  | -3.05196100 | -3.02825300 |
| H | 0.58006500  | -4.99043600 | -2.15224900 |
| H | 1.68756400  | -4.04697700 | -1.14144700 |
| C | -0.38604500 | -2.71928900 | -3.48198000 |
| H | 1.56428400  | -2.13419800 | -2.72340100 |

|   |             |             |             |
|---|-------------|-------------|-------------|
| H | 1.64558100  | -3.52577900 | -3.81497200 |
| H | -0.45237900 | -1.81953500 | -4.10121600 |
| H | -0.80348700 | -3.55939200 | -4.05619200 |
| C | -0.39901500 | -3.38213200 | -1.09321400 |
| H | -0.99215200 | -4.14263100 | -0.57281600 |
| C | -0.43377400 | -1.15533100 | -0.57814300 |
| C | 0.00000000  | 0.00000000  | 0.18508900  |
| C | 0.00000000  | 0.00000000  | 1.61972600  |
| N | -0.95703500 | -0.61794300 | 2.36371300  |
| P | -2.51389000 | -0.79221300 | 2.04044900  |
| C | -3.01327100 | -2.51011200 | 1.63728200  |
| C | -3.42640800 | -0.42057600 | 3.58303000  |
| C | -3.27076900 | 0.27388400  | 0.75459600  |
| H | -2.61027300 | -3.18301800 | 2.40065000  |
| H | -4.10483500 | -2.60217800 | 1.61160900  |
| H | -2.60176700 | -2.79684500 | 0.66777500  |
| H | -3.03222900 | -1.04800900 | 4.38808100  |
| H | -3.25862700 | 0.62682700  | 3.85211700  |
| H | -4.50078200 | -0.60211800 | 3.46855900  |
| H | -2.91961000 | -0.02000000 | -0.23898900 |
| H | -4.36290900 | 0.19033700  | 0.80424800  |
| H | -2.97764100 | 1.31291300  | 0.93488900  |
| N | 0.95703500  | 0.61794300  | 2.36371300  |
| P | 2.51389000  | 0.79221300  | 2.04044900  |
| C | 3.01327100  | 2.51011200  | 1.63728200  |
| C | 3.42640800  | 0.42057600  | 3.58303000  |
| C | 3.27076900  | -0.27388400 | 0.75459600  |
| H | 2.61027300  | 3.18301800  | 2.40065000  |
| H | 4.10483500  | 2.60217800  | 1.61160900  |
| H | 2.60176700  | 2.79684500  | 0.66777500  |
| H | 3.03222900  | 1.04800900  | 4.38808100  |
| H | 3.25862700  | -0.62682700 | 3.85211700  |
| H | 4.50078200  | 0.60211800  | 3.46855900  |
| H | 2.91961000  | 0.02000000  | -0.23898900 |
| H | 4.36290900  | -0.19033700 | 0.80424800  |
| H | 2.97764100  | -1.31291300 | 0.93488900  |

### 7H<sup>+</sup>

E = -1835.58021

ZPVE = 0.539686

E<sub>PCM</sub> = -1835.62821

|   |            |             |             |
|---|------------|-------------|-------------|
| C | 2.69856200 | -0.58839000 | -2.42235000 |
| H | 2.84297800 | -1.55869900 | -2.91055300 |
| O | 2.35273900 | -0.27151400 | -0.08988500 |
| N | 1.27691100 | -0.42799700 | -2.08445600 |
| C | 4.33014200 | 0.78352500  | -1.14167800 |
| C | 3.71055600 | 1.62847400  | -2.27232100 |
| H | 5.34267600 | 0.46772800  | -1.42587600 |
| H | 4.40601400 | 1.29936000  | -0.17892300 |
| C | 3.24758800 | 0.56899300  | -3.28890400 |
| H | 2.85023000 | 2.19889000  | -1.89755300 |
| H | 4.41668900 | 2.34859700  | -2.69792300 |

|   |             |             |             |
|---|-------------|-------------|-------------|
| H | 2.49545900  | 0.93052200  | -3.99669400 |
| H | 4.10758800  | 0.21129400  | -3.87035500 |
| C | 3.43888800  | -0.46295900 | -1.05041600 |
| H | 3.97982300  | -1.35846400 | -0.73257100 |
| C | 1.18276500  | -0.24408900 | -0.80680700 |
| C | -2.82456400 | -0.09049800 | -2.45064000 |
| H | -3.01375800 | 0.67058100  | -3.21458800 |
| O | -2.40341600 | 0.29458400  | -0.11661400 |
| N | -1.41678000 | -0.07459000 | -2.06955000 |
| C | -4.43448100 | -0.94597500 | -0.77194100 |
| C | -3.83428300 | -2.13071100 | -1.55218800 |
| H | -5.43447700 | -0.71028400 | -1.15919500 |
| H | -4.52871000 | -1.11028500 | 0.30585700  |
| C | -3.36199600 | -1.48107200 | -2.86682800 |
| H | -2.98312900 | -2.55771100 | -1.00584200 |
| H | -4.55344900 | -2.93931400 | -1.71402000 |
| H | -2.60857600 | -2.06530200 | -3.40497600 |
| H | -4.21461600 | -1.34292400 | -3.54383500 |
| C | -3.50524600 | 0.23166900  | -1.08268600 |
| H | -4.00086200 | 1.20444800  | -1.04256400 |
| C | -1.22636300 | 0.07085400  | -0.74594900 |
| C | -0.02732200 | 0.00524800  | -0.05473500 |
| C | -0.00042900 | 0.17395100  | 1.43945300  |
| N | -0.33916800 | 1.31936400  | 2.02065900  |
| P | -0.61245600 | 2.82618100  | 1.53528700  |
| C | -2.33382100 | 3.28170600  | 1.92240200  |
| C | 0.45311700  | 3.92155500  | 2.52836400  |
| C | -0.31782000 | 3.31989600  | -0.20866400 |
| H | -2.52211000 | 3.08856100  | 2.98254200  |
| H | -2.51509600 | 4.34012600  | 1.70831800  |
| H | -3.01382400 | 2.66419500  | 1.32945500  |
| H | 0.28814500  | 3.71147200  | 3.58892400  |
| H | 1.50306600  | 3.71982800  | 2.29428200  |
| H | 0.23258000  | 4.97463600  | 2.32458900  |
| H | -1.00963100 | 2.81628500  | -0.88751900 |
| H | -0.45346400 | 4.40342100  | -0.30228000 |
| H | 0.70507600  | 3.06537600  | -0.50082200 |
| N | 0.34486900  | -0.81485300 | 2.25336700  |
| P | 0.73277500  | -2.36783700 | 2.10427000  |
| C | 2.49884100  | -2.59621900 | 2.49000500  |
| C | -0.20090300 | -3.27389500 | 3.37993500  |
| C | 0.41133900  | -3.27307300 | 0.53993300  |
| H | 2.70444000  | -2.16539100 | 3.47433700  |
| H | 2.76232700  | -3.65902800 | 2.49680300  |
| H | 3.09908500  | -2.06879400 | 1.74445600  |
| H | -0.01133000 | -2.81351500 | 4.35367600  |
| H | -1.27250100 | -3.20692400 | 3.16792800  |
| H | 0.09686500  | -4.32727200 | 3.40887400  |
| H | 0.99258100  | -2.86008700 | -0.28715900 |
| H | 0.68046700  | -4.32692400 | 0.67454200  |
| H | -0.65127100 | -3.21108600 | 0.28693100  |
| H | -0.60692100 | -0.30045400 | -2.65368700 |

**Cartesian coordinates of B3LYP/6-31+G\* optimized transition state geometries of 3 with HCl including electronic energy (E), zero point energy (ZPVE).**

**3.HCl**

E = -804.92654

ZPVE = 0.159178

|    |             |             |             |
|----|-------------|-------------|-------------|
| C  | 2.12809200  | -1.75786000 | 0.89056900  |
| C  | -0.16005200 | -1.65371400 | 0.25095700  |
| C  | -1.37272500 | 2.52862400  | 0.83367500  |
| C  | -1.64932100 | 0.41514200  | -0.12941900 |
| N  | -1.07268500 | 1.11410200  | 0.75999600  |
| C  | -2.28197400 | -1.82896200 | -0.90391500 |
| N  | 0.96083500  | -1.05689400 | 0.38073800  |
| H  | 2.93312200  | -1.68112700 | 0.15255700  |
| H  | 2.46589000  | -1.25358600 | 1.80244300  |
| H  | -0.44766400 | 3.07784500  | 0.62270300  |
| H  | -1.67796100 | 2.77683800  | 1.85694300  |
| H  | 1.30887200  | 0.16680300  | -0.16971500 |
| Cl | 1.92587500  | 1.33310500  | -0.87063500 |
| H  | 1.91740300  | -2.81266900 | 1.10784700  |
| H  | -0.23389600 | -2.71793500 | 0.51047300  |
| H  | -2.39850000 | 0.83579200  | -0.82045100 |
| H  | -2.15558100 | 2.85401600  | 0.12862800  |
| C  | -1.38932800 | -1.03421900 | -0.27992800 |
| H  | -2.13069700 | -2.90111300 | -0.99833600 |
| H  | -3.18607900 | -1.42216200 | -1.34905700 |

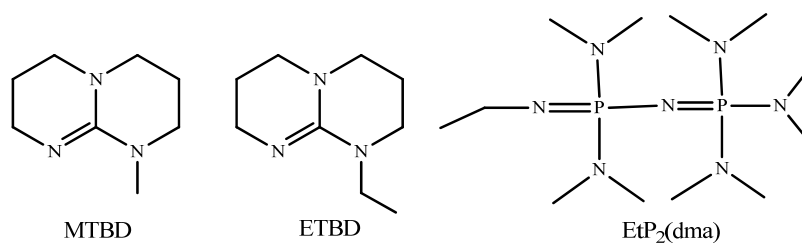

**Scheme S1**

**Table S1** Comparison of experimental and calculated (B3LYP/6-311+G\*\*//B3LYP/6-31+G\*) gas phase basicities (GB) of some organic superbases.

| Compounds                   | Gas phase basicity<br>(kcal/mol) |            |
|-----------------------------|----------------------------------|------------|
|                             | Experimental <sup>a</sup>        | Calculated |
| <b>MTBD</b>                 | 246.2                            | 247.3      |
| <b>ETBD</b>                 | 247.5                            | 248.2      |
| <b>EtP<sub>2</sub>(dma)</b> | 264.6                            | 265.7      |

<sup>a</sup> I. Kaljurand, I. A. Koppel, A. Kütt, E.-I. Rõõm, T. Rodima, I. Koppel, M. Mishima and I. Leito, *J. Phys. Chem. A* 2007, **111**, 1245 and references therein.

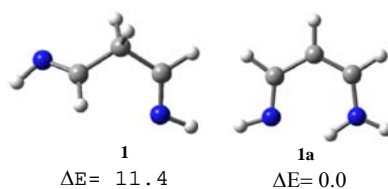

**Fig. S1** B3LYP/6-31+G\* optimized geometries of **1** and **1a** (relative energies are in kcal/mol) [Gray = carbon; blue = nitrogen; white = hydrogen].

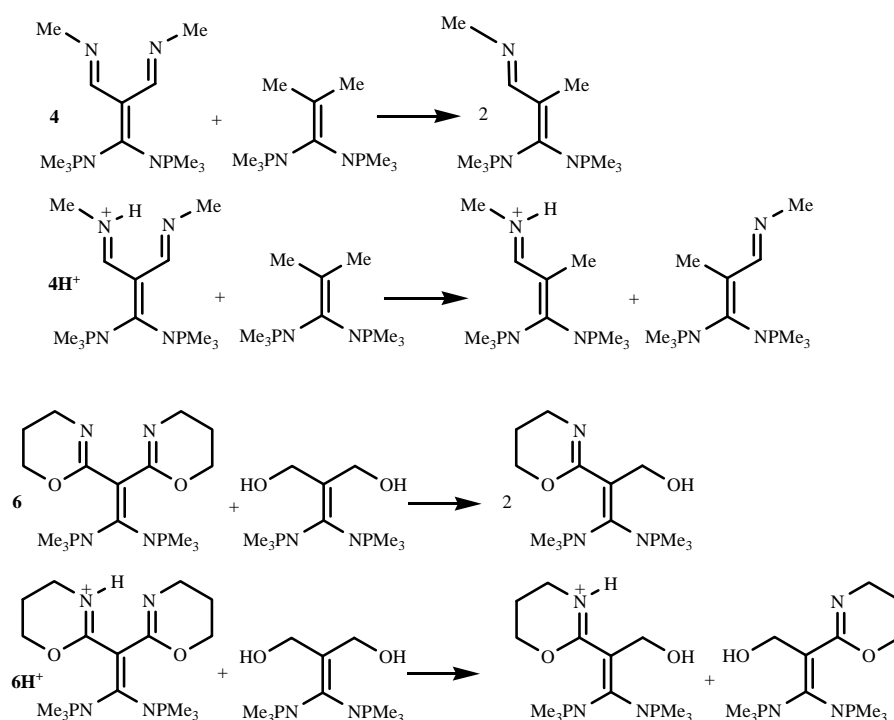

**Fig. S2** Isodesmic reactions used to obtain strain energy of unprotonated bases and the sum of the cation strain and the H-bond energies  $(SE+HB)^+$  for their corresponding monoprotated cations.

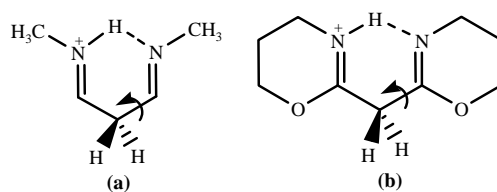

**Fig. S3** The model systems used to estimate cationic hydrogen bond energies for (a)  $4H^+$  and (b)  $6H^+$

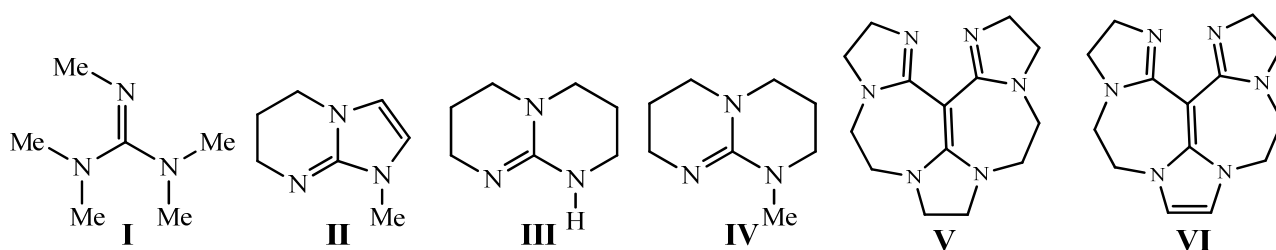

**Scheme S2**



**Table S2** Comparison of experimental and calculated (B3LYP/6-311+G\*\*//B3LYP/6-31+G\*)  $pK_a(\text{MeCN})$  of imine bases.

| Compounds  | $pK_a(\text{MeCN})$ |            |       |
|------------|---------------------|------------|-------|
|            | Experimental        | Calculated |       |
|            |                     | UAHF       | Bondi |
| <b>I</b>   | 25.0                | 24.1       | 27.6  |
| <b>II</b>  | 24.5                | 23.0       | 26.1  |
| <b>III</b> | 26.0                | 26.5       | 28.0  |
| <b>IV</b>  | 25.4                | 25.9       | 28.4  |
| <b>V</b>   | 29.2                | 33.5       | 32.4  |
| <b>VI</b>  | 31.9                | 35.9       | 34.8  |

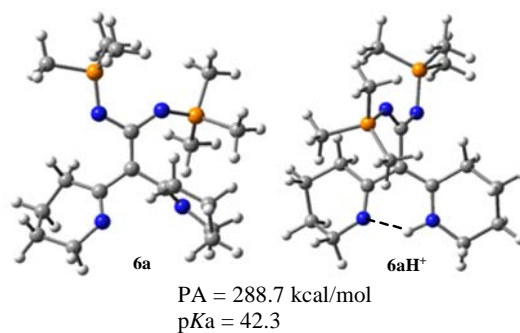

**Fig. S4** B3LYP/6-31+G\* optimized geometries of **6a** and its conjugate acids [Gray = carbon; blue = nitrogen; white = hydrogen; orange = phosphorus].
